# Supplementary material for: Photocatalytic activity of Ag/CuO/WO3 under visible-light irradiation
Source: Royal Society of Chemistry journal article supplement (doi:10.1039/c3ra23322g), 2013-01-01
Supplement: c3ra23322g.pdf [file c3ra23322g.pdf]

## Electronic Supplementary Information

# Photocatalytic activity of Ag/CuO/WO<sub>3</sub> under visible-light irradiation

Hideyuki Katsumata,<sup>\*a</sup> Yuichi Oda,<sup>a</sup> Satoshi Kaneco,<sup>a</sup> and Tohru Suzuki<sup>b</sup>

<sup>a</sup>Department of Chemistry for Materials, Graduate School of Engineering, Mie

University, Tsu, Mie 514-8507, Japan

<sup>b</sup>Environmental Preservation Center, Mie University, Tsu, Mie 514-8507, Japan

---

\*Corresponding Author.

Phone/fax: +81-59-231-9425; e-mail: [hidek@chem.mie-u.ac.jp](mailto:hidek@chem.mie-u.ac.jp).

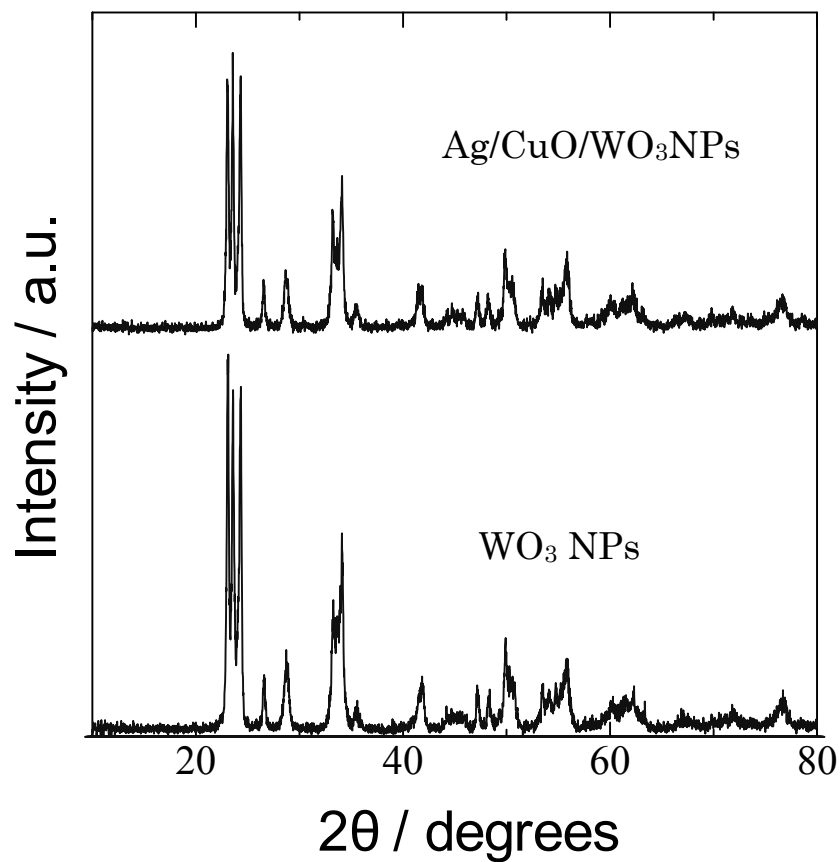

Fig. S1. XRD patterns of WO<sub>3</sub> and Ag/CuO/WO<sub>3</sub> NPs.

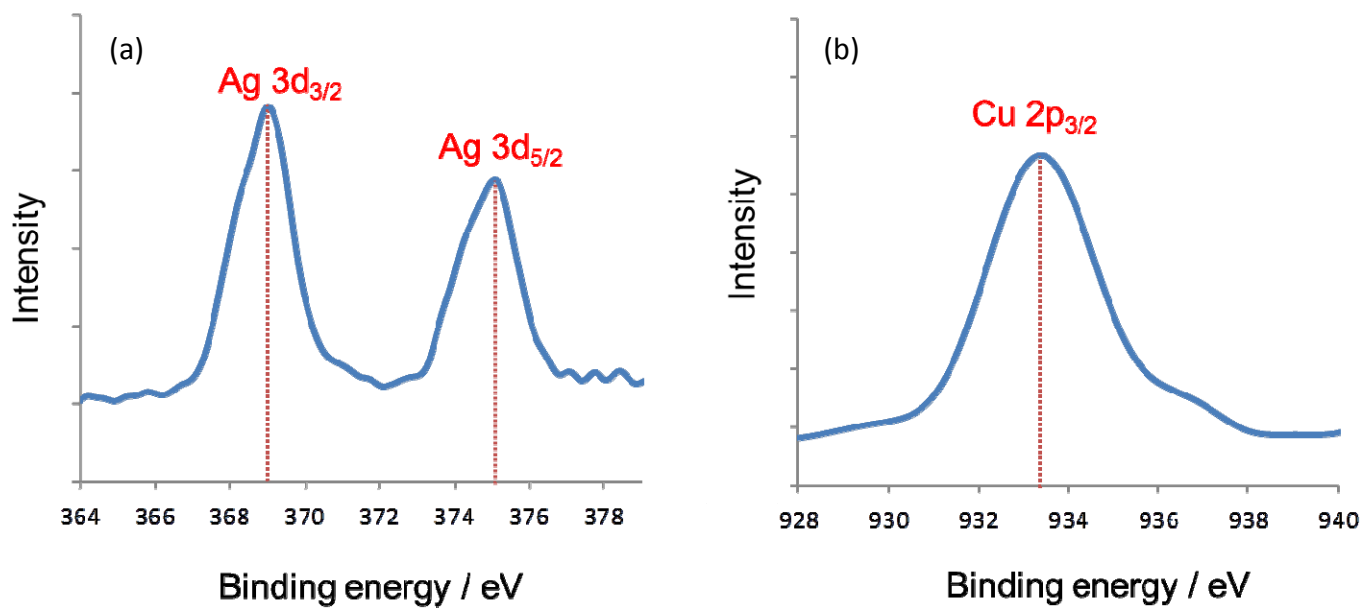

Fig. S2. XPS spectra of Ag/CuO/WO<sub>3</sub> NPs in (a) the Ag 3d<sub>5/2</sub> and Ag 3d<sub>3/2</sub>, and (b) the Cu 2p<sub>3/2</sub> binding energy regions.

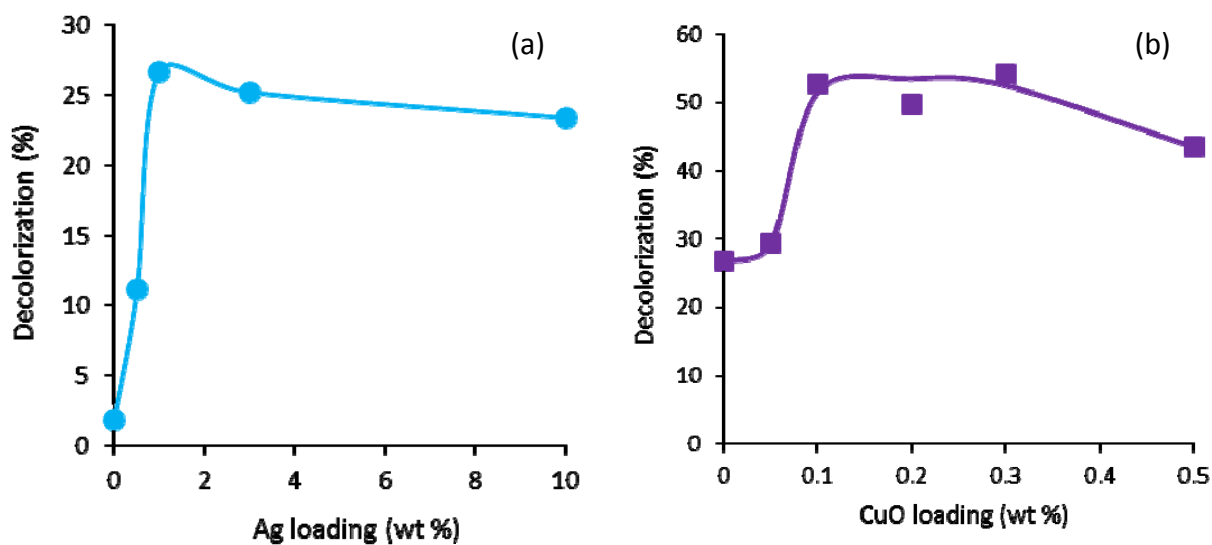

**Fig. S3.** (a) Effect of Ag loading on the decolorization of AR 88 with WO<sub>3</sub> NPs under visible light irradiation. (b) Effect of CuO loading on the decolorization of AR 88 with Ag/WO<sub>3</sub> NPs under visible light irradiation.

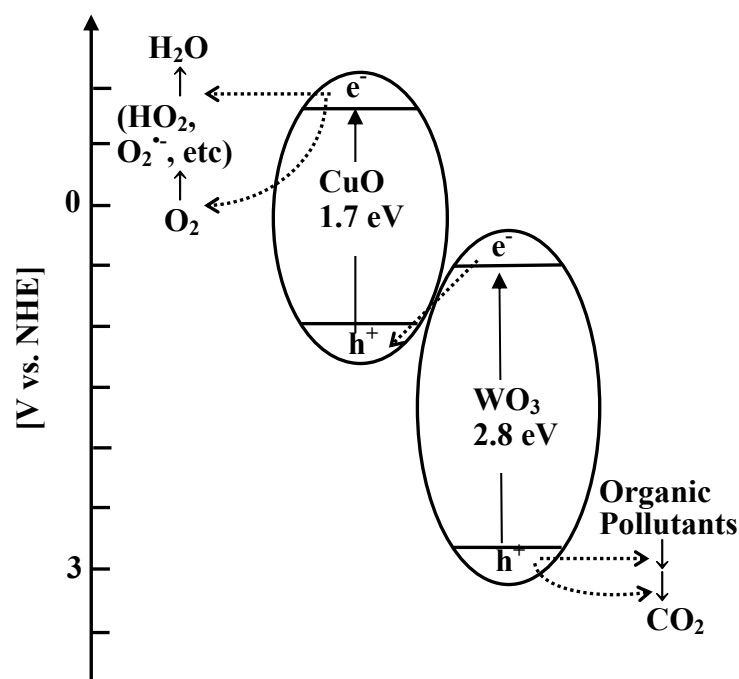

**Fig. S4.** Energy levels of the conduction and valence band edges vs NHE for WO<sub>3</sub> and CuO.

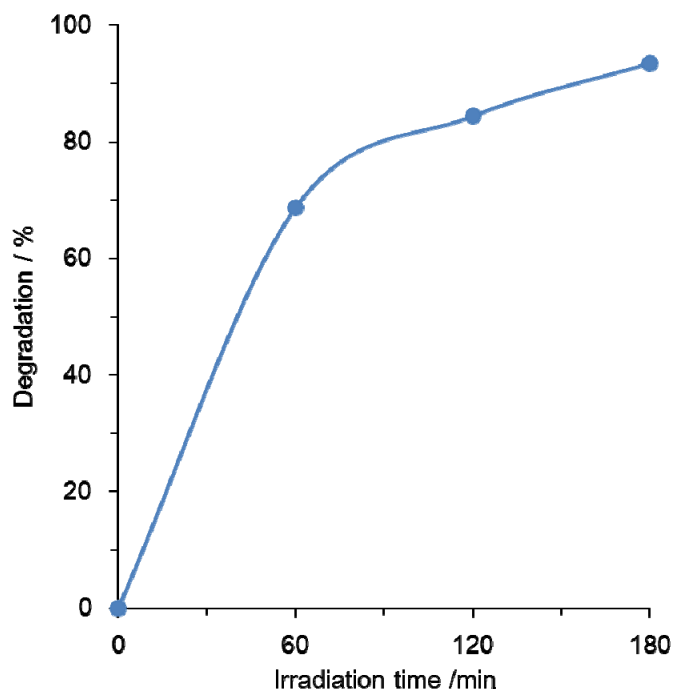

**Fig. S5.** Degradation of 2-chlorophenol (10 mg/L) with Ag/CuO/WO<sub>3</sub> NPs under visible-light irradiation.

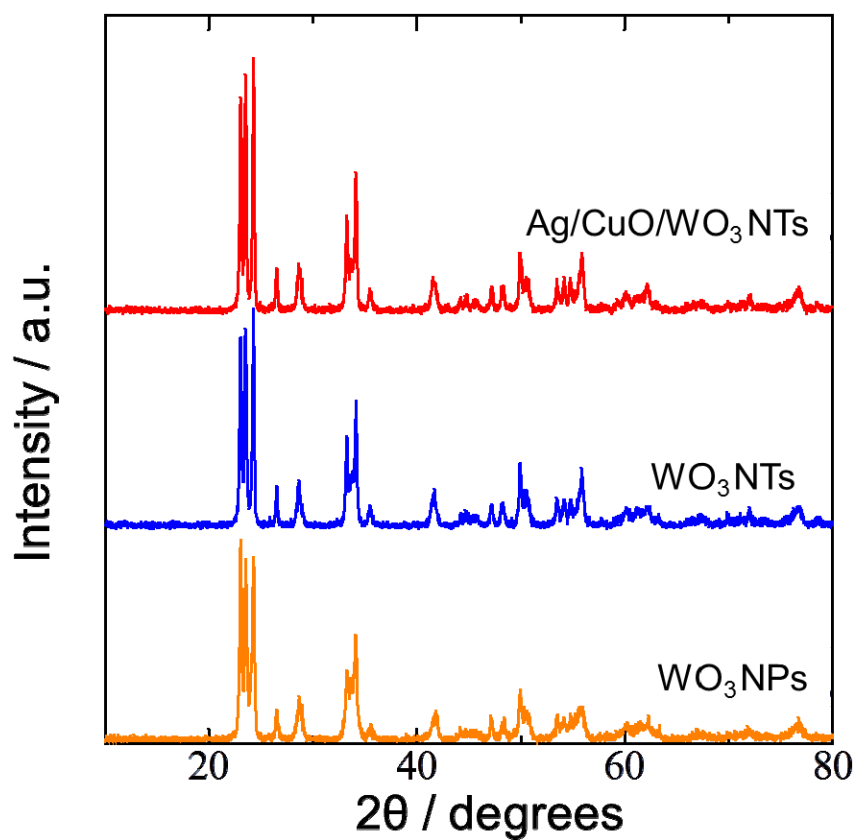

**Fig. S6.** XRD patterns of WO<sub>3</sub> NTs and Ag/CuO/WO<sub>3</sub> NTs, together with that of WO<sub>3</sub> NPs.

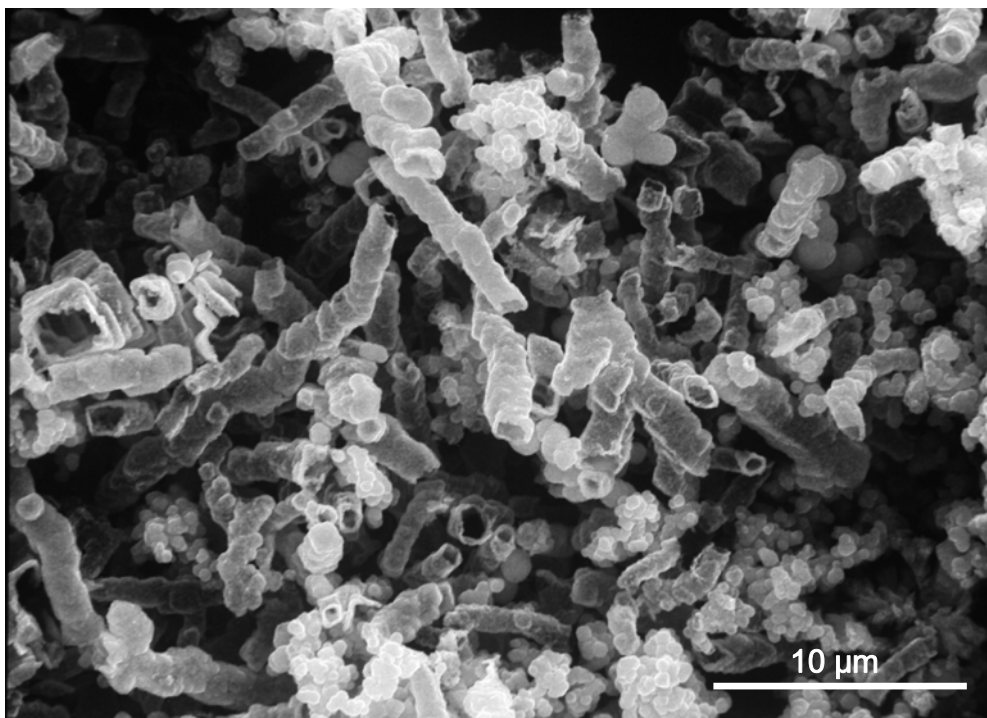

Fig. S7. SEM image of Ag/CuO/WO<sub>3</sub> NTs.

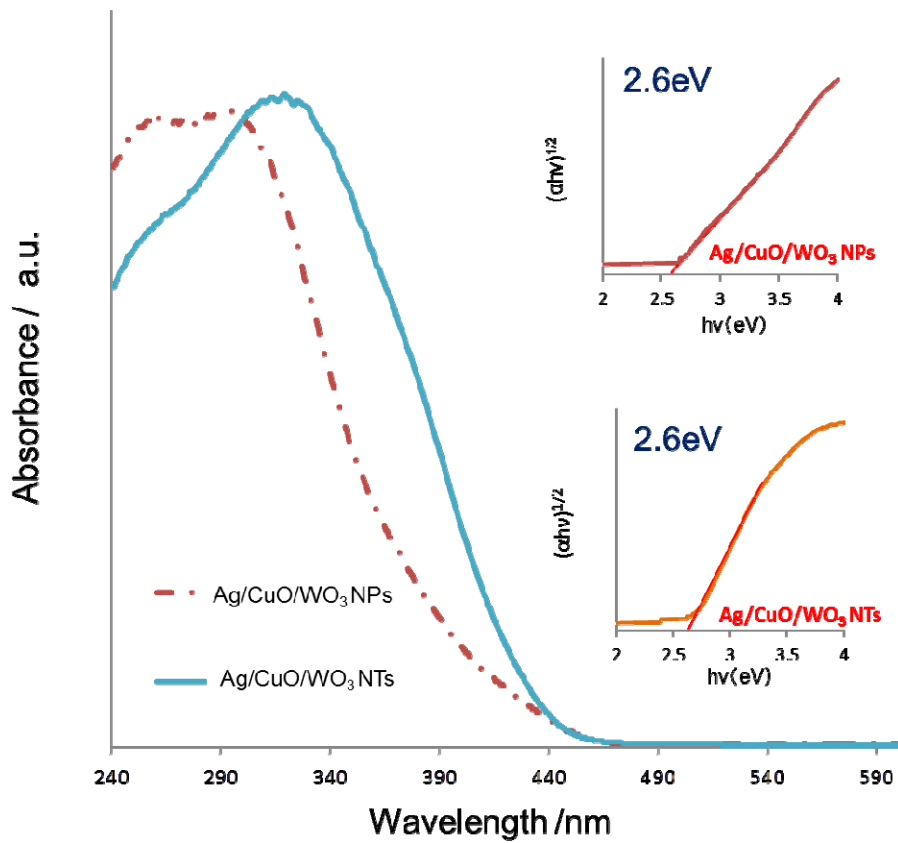

Fig. S8. UV-Visible absorption spectra of Ag/CuO/WO<sub>3</sub> NTs.

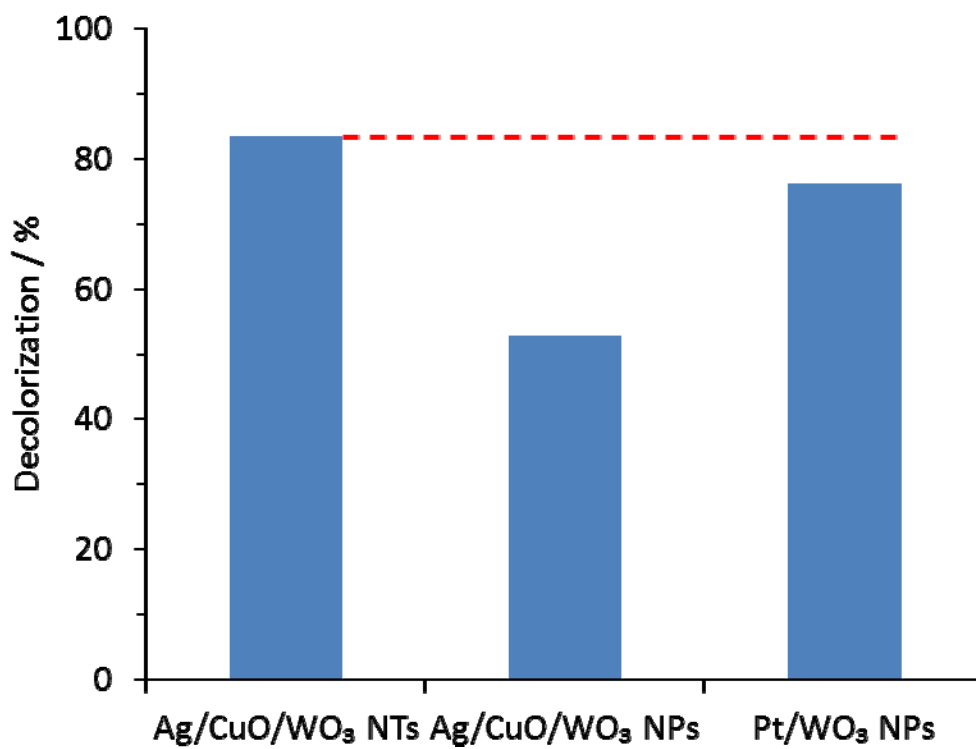

**Fig. S9.** Comparative experiments of the photocatalytic activities on the decolorization of AR 88 under visible light irradiation for 120 min.
